# Supplementary material for: Simple realization of efficient barrier performance of a single layer silicon nitride film via plasma chemistry
Source: Royal Society of Chemistry journal article supplement (doi:10.1039/c6cp06722k), 2016-01-01

## Supplementary information

### Barrier properties: general consideration

- >  $O_2/H_2O$  ingress : device degradation, poor lifetime
  - > Need for encapsulation with gas barrier materials
- > New flexible devices (organic electronic, inorganic/organic PV)
  - > Need for gas barrier films
- > Common gas barrier films (polymer) have limited properties

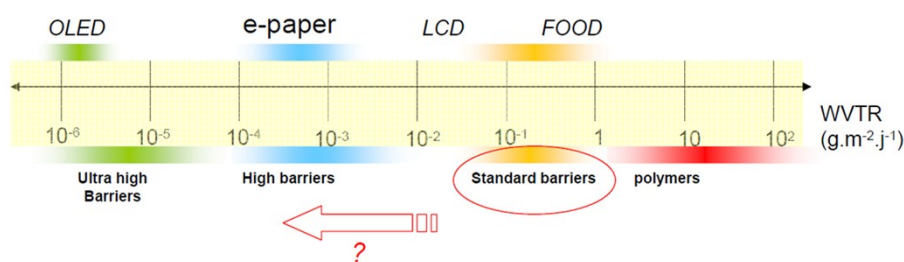

*How improve gas barrier properties of polymer*

### Factors that may affect the film properties

1. Film density should be high. For this we need high deposition rate
2. Higher N bonding in the film → Higher N<sub>2</sub> dissociation → High density plasma
3. Reduction/ stress control  
(possible due to higher energy ion bombardment)
4. Simple fabrication using single layer

## How to design and control plasma and films ?

### Design of Advanced Plasma Processes and Films

- Control of electron temperature and plasma density
  - **Advanced type of plasma sources** (RF/UHF hybrid sources)
- Control of plasma chemistry
  - Monitoring and controlling of plasma parameters and radicals
- **Correlation of film formation mechanism in terms of plasma chemistry and energy modeling !!!**
  - Energy modeling and integrated plasma diagnostics
  - Film properties (depo. rate, microstructure, optical, electrical, etc.)

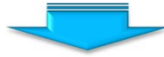

Thin film growth and control

## Strategy and plan for accomplishment

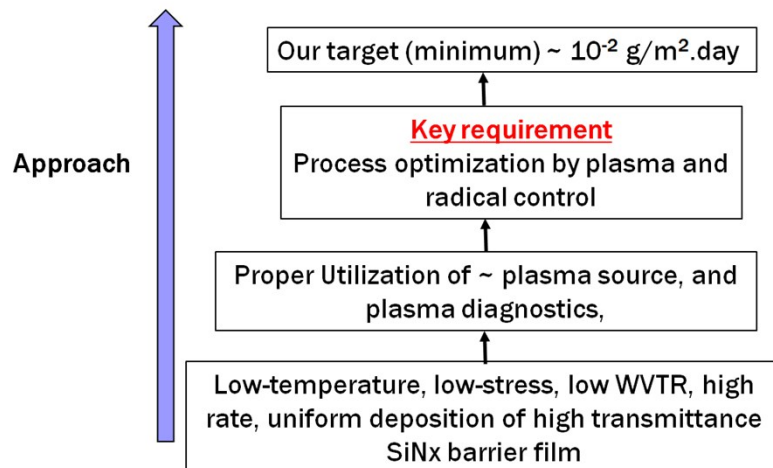

## Low pressure consideration

- Small mean free path of electrons (due to frequent collisions at high pressure) requires to apply **strong electric fields** (high voltage).
- Consequently given size of electron avalanche is developing in substantially smaller volume comparing to low pressure.
- As the result plasma at high pressure occurs in **narrow discharge channels**.
- Low pressure operation will be conducive for the efficient discharge.
- Low pressure operation will reduce the concern of particle/dust generation.
- Low pressure operation will favor cost effective deposition with utilization of low-content (low gas flow rate) of chemical precursor.

## Consideration of ionization mean free path

The ion flow in the cylindrical region of the orifice is diffusion limited because of the short collision mean free path for charge exchange with the neutrals.

Neutral density =  $n_n$

The mean ion mean free path for ionization =

$$\lambda_i = 1/(n_0 \sigma_i)$$

S. C. Brown, *Basic Data of Plasma Physics 2nd edn* (Cambridge, MA: MIT Press) (1967)

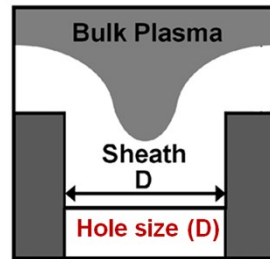

| Cross section for ion                    | p = 60 mTorr              |                  | p = 120 Torr    |                  |
|------------------------------------------|---------------------------|------------------|-----------------|------------------|
|                                          | $n_n$ (cm <sup>-3</sup> ) | $\lambda_i$ (mm) | $n_n$           | $\lambda_i$ (mm) |
| $\sigma_i \approx 10^{-14} \text{ cm}^2$ | $2 \times 10^9$           | 0.505            | $3 \times 10^9$ | 0.303            |

Requirement: Hole size  $\geq \lambda_i$

## Showerhead design for multi-holes hollow cathode discharge

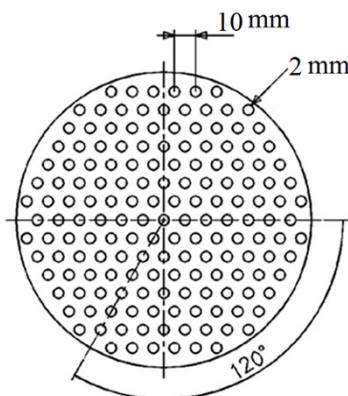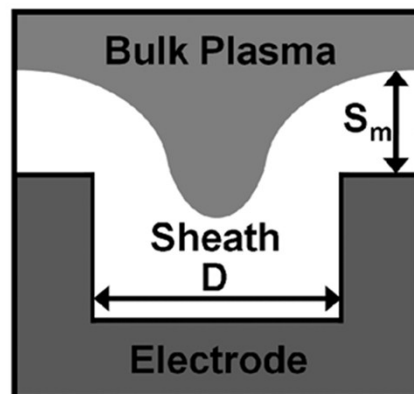

Supplement: c6cp06722k1.pdf [file c6cp06722k1.pdf]
